# **Microbial contributions to subterranean methane sinks**

2 J. T. Lennon<sup>1\*</sup>, D. Nguyễn-Thùy<sup>2</sup>, N. Phạm Đức<sup>3</sup>, A. Drobniak<sup>4</sup>, P. Tạ Hòa<sup>2</sup>, T.M. Pham<sup>3</sup>, T.  
Streil<sup>5</sup>, K.D. Webster<sup>6</sup>, A. Schimmelmann<sup>6</sup>

4

<sup>1</sup> Department of Biology, Indiana University, Bloomington, Indiana, USA

6

<sup>2</sup> Faculty of Geology, Vietnam National University, Hanoi, Vietnam

<sup>3</sup> Department of Microbiology, Vietnam National University, Hanoi, Vietnam

8

<sup>4</sup> Indiana Geological Survey, Indiana University, Bloomington, Indiana, USA

<sup>5</sup> SARAD GmbH, Dresden, Germany

10

<sup>6</sup> Department of Geological Sciences, Indiana University, Bloomington, Indiana, USA

12

\* corresponding author:

Jay T. Lennon

14

Department of Biology

1001 East 3rd Street

16

Indiana University

Bloomington, Indiana 47405

18

812-856-0962

lennonj@indiana.edu

20

22

# ABSTRACT

Understanding the sources and sinks of methane ( $\text{CH}_4$ ) is critical for predicting and managing global biogeochemical cycles. Recent studies have reported that  $\text{CH}_4$  concentrations in cave ecosystems are depleted and that these subterranean environments may act as a daily sinks for atmospheric  $\text{CH}_4$ . It has been hypothesized that this  $\text{CH}_4$  depletion may be caused by radiolysis, an abiotic process whereby  $\text{CH}_4$  is oxidized via interactions with ionizing radiation derived from radon decay. Alternatively, the depletion of  $\text{CH}_4$  concentrations could be due to biological processes, specifically oxidation by methanotrophic bacteria. We theoretically explored the radiolysis hypothesis and conclude that it is a kinetically constrained process that is unlikely to lead to the rapid loss of  $\text{CH}_4$  in subterranean environments. We present experimental results to support this claim. We tested the microbial oxidation hypothesis in a set of mesocosm experiments that were conducted in Vietnamese caves. Our results reveal that methanotrophic bacteria associated with cave rocks consume  $\text{CH}_4$  at a rate of  $1.33 - 2.70 \text{ mg } \text{CH}_4 \cdot \text{m}^{-2} \cdot \text{d}^{-1}$ . These  $\text{CH}_4$  oxidation rates equal or exceed what has been reported in other habitats, including agricultural systems, grasslands, deciduous forests, and Arctic tundra. As such, microbial methanotrophy has the potential to significantly oxidize  $\text{CH}_4$  in caves, but also smaller-size open subterranean spaces, such as cracks, fissures, and other pores that are connected to and rapidly exchange with the atmosphere. Future studies are needed to understand how subterranean  $\text{CH}_4$  oxidation scales up to affect regional and global  $\text{CH}_4$  cycling.

## INTRODUCTION

Atmospheric methane (CH<sub>4</sub>) is a potent greenhouse gas with rising concentrations that can mainly be attributed to anthropogenic activities (IPCC, 2013; US EPA, 2015). Credible forecasting of global warming by climate models mandates knowledge about the sources and sinks of atmospheric CH<sub>4</sub>. One potentially important, but overlooked sink of CH<sub>4</sub> is the oxidation that occurs in subterranean environments. Recent studies have documented that cave ecosystems sometimes have subatmospheric concentrations of CH<sub>4</sub>. For example, in a four-year study of St. Michael's Cave in Gibraltar, CH<sub>4</sub> concentrations of cave air were typically 10-fold below atmospheric levels (Mattey *et al.*, 2013). A similar pattern was documented in a set of Spanish caves with some samples having CH<sub>4</sub> concentrations that were below detection limits suggesting near-complete removal of CH<sub>4</sub> from underground air (Fernandez-Cortes *et al.*, 2015).

Two hypotheses have been put forth to explain the pattern of CH<sub>4</sub> depletion in subterranean environments. First, CH<sub>4</sub> is a carbon and energy source that can be used by methanotrophic bacteria. Although methanotrophic bacteria were found in Movile Cave in Romania (Hutchens *et al.*, 2004), microbiological surveys of methane oxidizing bacteria in caves are relatively uncommon. Inferences about methanotrophy in caves have also been made based on evidence from stable isotopes (Peryt *et al.*, 2012). For example, an inverse relationship between CH<sub>4</sub> concentrations and CH<sub>4</sub> carbon stable isotope ratios (i.e.,  $\delta^{13}\text{C}$ ) in St. Michael's cave was considered a diagnostic signature of methanotrophy (Mattey *et al.*, 2013). A second hypothesis is that CH<sub>4</sub> depletion in subterranean ecosystems is due to radiolysis. This abiotic mechanism of CH<sub>4</sub> oxidation was developed to explain low CH<sub>4</sub> concentrations in a poorly ventilated cave that had a high density of ions, but no recoverable methanotrophic bacteria (Fernandez-Cortes *et al.*, 2015). An inverse correlation between the concentration of CH<sub>4</sub> and

ions in cave air suggests that  $\alpha$ -particles from radon decay could contribute to removal of CH<sub>4</sub>  
 70 from subterranean environments (Fernandez-Cortes *et al.*, 2015).

In this study, we evaluate the relative importance of biotic and abiotic mechanisms that  
 72 have been put forward to explain low concentrations of CH<sub>4</sub> observed in subterranean  
 environments. First, we develop theoretical expectations in an effort to constrain the rates of  
 74 radiolytic CH<sub>4</sub> oxidation. Second, we present results from a controlled laboratory experiment  
 aimed at quantifying the effect of ionizing radiation on the rate of CH<sub>4</sub> oxidation. Third, we  
 76 discuss findings from a set of field mesocosm experiments in Vietnamese caves to quantify the  
 methanotrophic potential of cave microbial communities.

## 78 RESULTS AND DISCUSSION

**80 Weak theoretical support for the importance of radiolytic CH<sub>4</sub> oxidation** — The following  
 thought experiments reveal that radiolysis is a process that contributes minimally to CH<sub>4</sub>  
 82 oxidation in subterranean environments on the time scale of days to weeks. We arrive at this  
 conclusion based on the imbalance between the large number of CH<sub>4</sub> molecules and the  
 84 comparatively small number of radioactive decay events that are typical in caves.

Ionizing radiation in the air of subterranean limestone-based ecosystems is derived  
 86 predominantly from  $\alpha$ -particles that are generated during radon decay (Cigna, 2005; Alvarez-  
 Gallego *et al.*, 2005). These  $\alpha$ -particles could lead to the oxidation of CH<sub>4</sub> *via* different  
 88 mechanisms. For example, radiolysis could result from the direct collision of  $\alpha$ -particles with  
 CH<sub>4</sub> molecules. In this case, an  $\alpha$ -particle splits a CH<sub>4</sub> molecule, which triggers a subsequent  
 90 exothermic oxidation reaction of ions and radicals with atmospheric oxygen. However, with a  
 decay rate of  $\sim 35,000$  <sup>222</sup>Rn atoms per second in a cubic meter of air, as measured in a Spanish

cave (Fernandez-Cortes *et al.*, 2015), it would take nearly 50 million years to eliminate 2 ppm of CH<sub>4</sub> as a result of direct collision between  $\alpha$ -particles and CH<sub>4</sub> molecules.

A more likely mechanism occurs when radiogenic energy interacts with water molecules and other major chemical constituents of cave air and thus produces ions and radicals that enter secondary chemical reactions with CH<sub>4</sub>. For example, radiolysis of water vapor *via* radon decay could generate hydroxyl radicals ( $\bullet$ OH) that act to remove CH<sub>4</sub>. However, if every  $\alpha$ -decay at 35,000 Bq m<sup>-3</sup> generates  $4.3 \cdot 10^5$  ions and radicals (Fernandez-Cortes *et al.*, 2015), it would still require more than 100 years to eliminate 2 ppm of CH<sub>4</sub>. In fact, this likely overestimates the potential for radiolytic CH<sub>4</sub> oxidation since the calculations unrealistically assume that all  $\bullet$ OH selectively react with CH<sub>4</sub>. In sum, our assumptions and calculations suggest that radiolysis is a kinetically constrained process that is unlikely to act as a daily CH<sub>4</sub> sink in subterranean ecosystems (Fernandez-Cortes *et al.*, 2015). More detail on the calculations that were used to arrive at our predictions can be found in the Supplementary Information,

**Weak experimental support for the importance of radiolytic CH<sub>4</sub> oxidation** — Results from a laboratory experiment confirm our theoretical predictions by demonstrating that ionizing radiation had a minimal effect on CH<sub>4</sub> oxidation rates. We placed 7.08 g uranium metal powder in a Petri dish on the bottom of a humid polyethylene bag containing 43 L of air with an elevated CH<sub>4</sub> concentration (23.5 ppm). The radioactivity inside the closed bag containing depleted uranium was approximately  $2.5 \cdot 10^6$  Bq m<sup>-3</sup>, which is 70-fold higher than the natural radiation reported in Spanish cave air (Fernandez-Cortes *et al.*, 2015). Yet, in the presence of strong ionizing radiation, CH<sub>4</sub> was lost from the system at the slow rate of  $0.197 \pm 0.0005$  ( $\pm$  standard error) ng CH<sub>4</sub> · m<sup>-3</sup> · d<sup>-1</sup>, which was indistinguishable from the diffusive loss of CH<sub>4</sub> from

polyethylene control bags lacking uranium (one-sample t-test:  $t_6 = -0.97$ ,  $P = 0.37$ , Fig.1). More detail concerning experimental procedures can be found in Supplementary Information.

**Strong experimental support for the importance of biotic CH<sub>4</sub> oxidation** — The results from our field mesocosm experiments suggest that CH<sub>4</sub> depletion can be achieved *via* the biological activity of methanotrophic bacteria that are associated with rocks inside cave ecosystems. In two separate caves with low radon abundances ( $\leq 100 \text{ Bq m}^{-3}$ ) on the island of Cát Bà in Vietnam, we deployed 200-L polyethylene bags filled with cave air containing limestone rocks that were collected from inside the cave. Half of these mesocosms ( $n = 3$ ) were treated with a 10 % bleach (sodium hypochlorite) solution to inhibit microbial activity ("dead") while the other mesocosms ("live") were treated with an equal volume of water ( $n = 3$ ). After incubating *in situ* overnight, CH<sub>4</sub> concentrations in the dead mesocosms were indistinguishable from the control mesocosms (no cave rocks) and the cave air (one-sample t-tests,  $P > 0.52$ , Fig. 2). In contrast, we observed an  $87 \% \pm 0.047 \%$  (mean  $\pm$  SEM) reduction of CH<sub>4</sub> concentrations in the live mesocosms.

From our experimental data, we estimate that the rate of CH<sub>4</sub> oxidation associated with cave rocks was between  $1.33$  and  $2.70 \text{ mg CH}_4 \cdot \text{m}^{-2} \cdot \text{d}^{-1}$ . To the best of our knowledge, these are the first direct measurements of biological CH<sub>4</sub> oxidation in a cave ecosystem. The magnitude of these rates equals or exceeds the rates of CH<sub>4</sub> oxidation that have been reported in soils from agricultural systems, grasslands, mature forests, and Arctic tundra (Whalen & Reeburgh, 1990; Suwanwaree & Robertson, 2005; von Fischer *et al.*, 2009). This comparison is noteworthy because caves maintain relatively constant temperatures throughout the year, while soils in mid-to-high latitudes often experience lower temperatures during the winter season, which results in reduces rates of CH<sub>4</sub> oxidation (e.g., Groffman *et al.*, 2006). As such, when integrated over

annual time scales, subterranean environments like caves may act as a larger sink for atmospheric CH<sub>4</sub> than has been previously recognized.

Our experiments revealed that methanotrophic bacteria were abundant in the biofilms that were associated with Vietnamese cave rocks. We conducted quantitative PCR assays on DNA extracted from rocks that were incubated in the live mesocosms using primers that targeted the particulate methane monooxygenase (*pmoA*) gene, which is responsible for bacterial CH<sub>4</sub> oxidation (see Supplementary Information for more detail). From this, we recovered  $1.0 \cdot 10^4$  to  $1.5 \cdot 10^4$  *pmoA* gene copies per gram of rock biofilm. When standardized by 16S rRNA gene copy number, we estimate that the relative abundance of methanotrophs in the cave biofilms ranged from 0.16 to 1.48 % of the microbial community.

Despite recent global-scale efforts to survey the diversity of microbial communities from a wide range of habitats, reports of methane oxidizing bacteria from cave ecosystems are scarce. For example, using cultivation-independent approaches, no sequences closely matching known methanotrophs were recovered from the Frasassi cave complex in central Italy (Macalady *et al.*, 2006). Methanotrophs were recovered from some, but not all Spanish caves (Fernandez-Cortes *et al.*, 2015). In limestone caves of Kartchner Caverns, Arizona (USA), a single sequence was recovered that was closely related to *Methylocella*, which is a facultative methanotroph (Ortiz *et al.*, 2013). Similarly, only one sequence from the walls of a karstic cave in Slovenia was closely related to *Methylococcus*, which is an obligate methanotroph (Pašič *et al.*, 2010). In contrast, the presence and activity of methanotrophs was documented in water and mat samples collected from Movile Cave using stable isotope probing (SIP). In this study, researchers tracked <sup>13</sup>C-labeled CH<sub>4</sub> into the DNA of bacteria that were closely related to known methanotrophs such as *Methylomonas*, *Methylococcus*, and *Methylocystis/Methylosinus* (Hutchens *et al.*, 2004). Given

their potential role in consuming subterranean CH<sub>4</sub>, more studies are needed to characterize the  
diversity and activity of methanotrophs in a wider range of cave ecosystems.

In the methane-depleted Castañar Cave in Spain, the importance of methanotrophy was  
ruled out based on the assumption that bacteria would not be able to meet their metabolic  
demands for maintenance and growth (Fernandez-Cortes *et al.*, 2015). However, this argument  
overlooks two important ecophysiological features of microorganisms in natural ecosystems.  
First, growing evidence suggests that many microorganisms can tolerate extreme energy  
limitation on timescales ranging from centuries to millennia (Hoehler & Jørgensen, 2013) owing  
to life-history strategies such as dormancy (Lennon & Jones, 2011). Second, microorganisms in  
nature are commonly challenged with "feast or famine" conditions. For example, the supply of  
CH<sub>4</sub> to cave habitats varies through time depending on the source of CH<sub>4</sub>, seasonality,  
ventilation, microclimatic conditions, and geography. Methanotrophic bacteria in caves are likely  
adapted to such fluctuations in CH<sub>4</sub> concentrations, which are not captured with synoptic  
sampling.

**Conclusion** — Although ionizing radiation can accumulate in poorly vented, deep recesses of  
some caves, this is neither necessary nor sufficient to explain the pattern of CH<sub>4</sub> depletion in  
subterranean ecosystems. Both theoretical and experimental lines of evidence suggest it is  
unlikely that radiolytically induced CH<sub>4</sub> oxidation serves as a significant mechanism for rapid  
depletion of CH<sub>4</sub> in cave air. Rather, our results support the hypothesis that bacterial  
methanotrophy alone has the potential to significantly oxidize CH<sub>4</sub> in caves, but also smaller-size  
open subterranean spaces, such as cracks, fissures, and other pores that are connected to the  
atmosphere.



184

# ACKNOWLEDGEMENTS

186 We acknowledge support from the U.S. Department of Energy, Office of Science, Office of  
Basic Energy Sciences (DE-SC0006978 to A.S.); the National Science Foundation (1442246 to  
188 J.T.L.); the U.S. Army Research Office (W911NF-14-1-0411 to J.T.L.); the Indiana University  
Office for the Vice President of International Affairs; the Indiana University College of Arts and  
190 Sciences; and the Indiana University Provost's Travel Award for Women in Science. We thank  
G. Etiope for constructive feedback on an earlier version of this manuscript and G. Crouch for  
192 discussions about radiation physics. In addition, we thank B. K. Lehmkuhl for technical support,  
along with Minh Schimmelmenn and Bui Thi Viet Ha for logistical support. Corresponding data  
194 and code for this manuscript can be found at <https://github.com/LennonLab/radiolyticCH4>.

196

## REFERENCES

- 198 Alvarez-Gallego M, Garcia-Anton E, Fernandez-Cortes A, Cuezva S, Sanchez-Moral S. High  
radon levels in subterranean environments: monitoring and technical criteria to ensure  
200 human safety (case of Castañar cave, Spain) (2005). *Journal of Environmental  
Radioactivity* **145**, 19-29.
- 202 Cigna AA (2005) Radon in caves. *International Journal of Speleology* **34**, 1-18.  
Fernandez-Cortes A, Cuezva S, Alvarez-Gallego M, Garcia-Anton E, Concepcion P, Benavente  
204 D, Jurado V, Saiz-Jimenez C, Sanchez-Moral S (2015) Subterranean atmospheres may  
act as daily methane sinks. *Nature Communications* **6**, 7003.
- 206 Groffman PM, Hardy JP, Driscoll CT, Fahey TJ (2006) Snow depth, soil freezing, and fluxes of  
carbon dioxide, nitrous oxide and methane in a northern hardwood forest. *Global Change  
208 Biology* **12**, 1748–1760
- Hoehler TM, Jørgensen BB (2013) Microbial life under extreme energy limitation. *Nature  
210 Reviews Microbiology* **11**, 83-94.
- Hutchens E, Radajewski S, Dumont MG, McDonald IR, Murrell CJ (2004) Analysis of  
212 methanotrophic bacteria in Movile Cave by stable isotope probing. *Environmental  
Microbiology* **6**, 111–120.
- 214 IPCC (2013) The Physical Science Basis. Contribution of Working Group I to the Fifth  
Assessment Report of the Intergovernmental Panel on Climate Change (eds. Stockner TF  
216 *et al.*) Cambridge University Press.
- Lennon JT, Jones SE (2011) Microbial seed banks: ecological and evolutionary implications of  
218 dormancy. *Nature Reviews Microbiology* **9**, 119-130.

Macalady JL, Lyon EH, Koffman B, Albertson LK, Meyer K, Galdenzi S, Mariani S (2006)

220 Dominant microbial populations in limestone-corroding stream biofilms, Frasassi cave  
system, Italy. *Applied and Environmental Microbiology* **72** 5596-5609.

222 Matthey DP, Fisher R, Atkinson TC, Latin J-P, Durrel R, Ainsworth M, Lowry D, Fairchild IJ  
(2013) Methane underground air in Gibraltar karst. *Earth and Planetary Science Letters*  
224 **374**, 71-80.

Ortiz M, Neilson JW, Nelson WM, Legatzki A, Byrne A, Yu Y, Wing RA, Soderlund CA,  
226 Pryor BM, Pierson LS, Maier RM (2013) Profiling bacterial diversity and taxonomic  
composition on speleothem surfaces in Kartchner Caverns, AZ. *Microbial Ecology* **65**  
228 371-383.

Pašič L, Kovče B, Sket B, Herzog-Velikonja B (2010) Diversity of microbial communities  
230 colonizing the walls of a Karstic cave in Slovenia. *FEMS Microbiology Ecology* **71** 50-60

Peryt TM, Kurakiewicz T, Peryt D, Poberezhskyy A (2012) Carbon and oxygen isotopic  
232 composition of the Middle Miocene Badenian gypsum-associated limestones of West  
Ukraine. *Geologica Acta* **10**, 319 - 332.

234 Suwanwaree P, Robertson GP (2005) Methane oxidation in forest, successional, and no-till  
agricultural ecosystems: effects of nitrogen and soil disturbance. *Soil Science Society of*  
236 *America Journal* **69**, 1722–1729

US EPA (US Environmental Protection Agency) (2015) Inventory of U.S. greenhouse gas  
238 emissions and sinks: 1990 - 2013.

von Fischer JC, Butters G, Duchateau PC, Thelwell RJ, Siller R (2009) In situ measures of  
240 methanotroph activity in upland soils: A reaction-diffusion model and field observation  
of water stress. *Journal of Geophysical Research* **114**, 0148-0227/09/2008JG000731

- 242 Whalen SC, Reeburgh WS (1990) Consumption of atmospheric methane by tundra soils. *Nature*  
**346**, 160-162.

# FIGURE CAPTIONS

**Fig. 1.** Rates of methane ( $\text{CH}_4$ ) oxidation were not significantly affected by ionizing radiation.

We conducted a laboratory experiment where we tracked the concentration of  $\text{CH}_4$  in a polyethylene bag containing air and ionizing radiation from a source of uranium metal powder (black line,  $n = 1$ ) to the concentration of  $\text{CH}_4$  in control bags without an added source of ionizing radiation (grey lines,  $n = 7$ ). We attribute the slow loss of  $\text{CH}_4$  in all trials to diffusion through polyethylene bag.

**Fig. 2.** Field mesocosm experiments in two Vietnamese caves support the biological methane ( $\text{CH}_4$ ) oxidation hypothesis. Control mesocosms contained no cave rocks and provided an estimate for the diffusive loss of  $\text{CH}_4$ ; "dead" mesocosms contained cave rocks that were treated with a 10 % bleach solution; "live" mesocosms contained cave rocks and a volume of water (150 mL) equivalent to the volume of bleach used in the "dead" treatment. The dashed horizontal lines correspond to the  $\text{CH}_4$  concentrations in the Hoa Cương and Minh Châu caves on Cát Bà island, northern Vietnam.

**Fig. 1.**

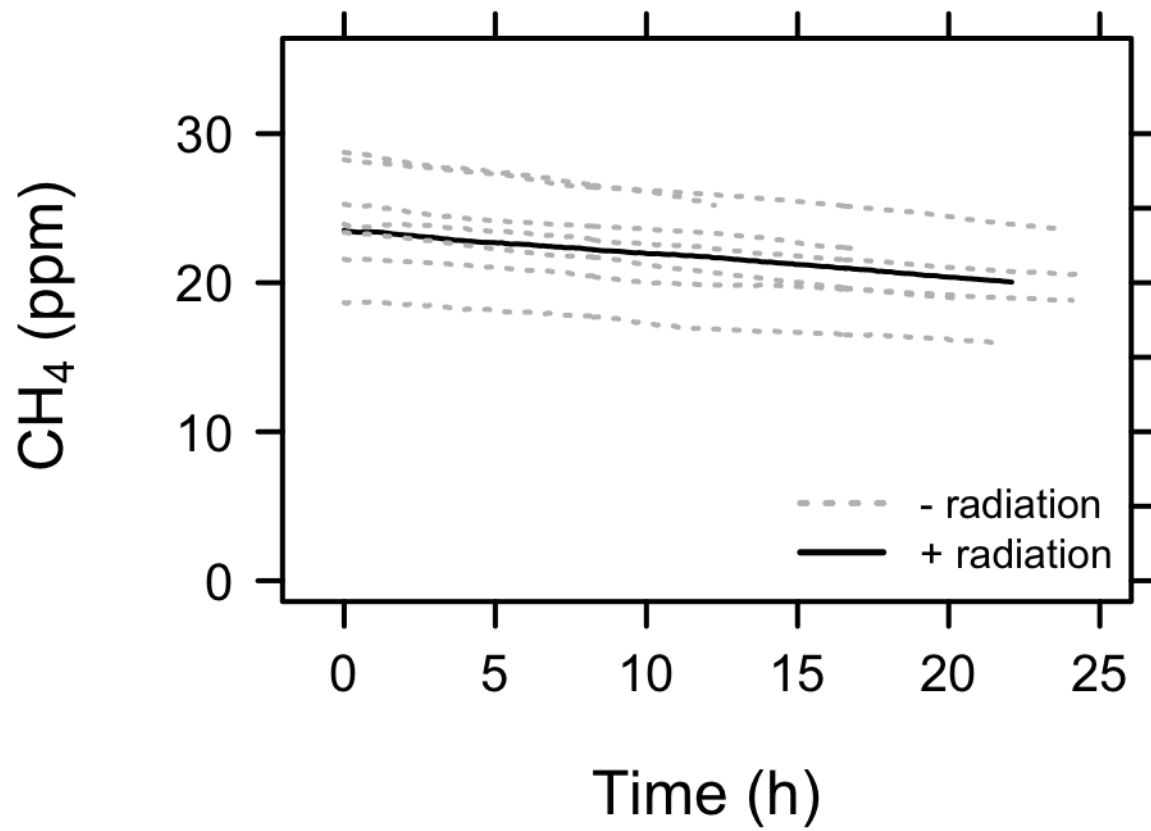

**Fig. 2.**

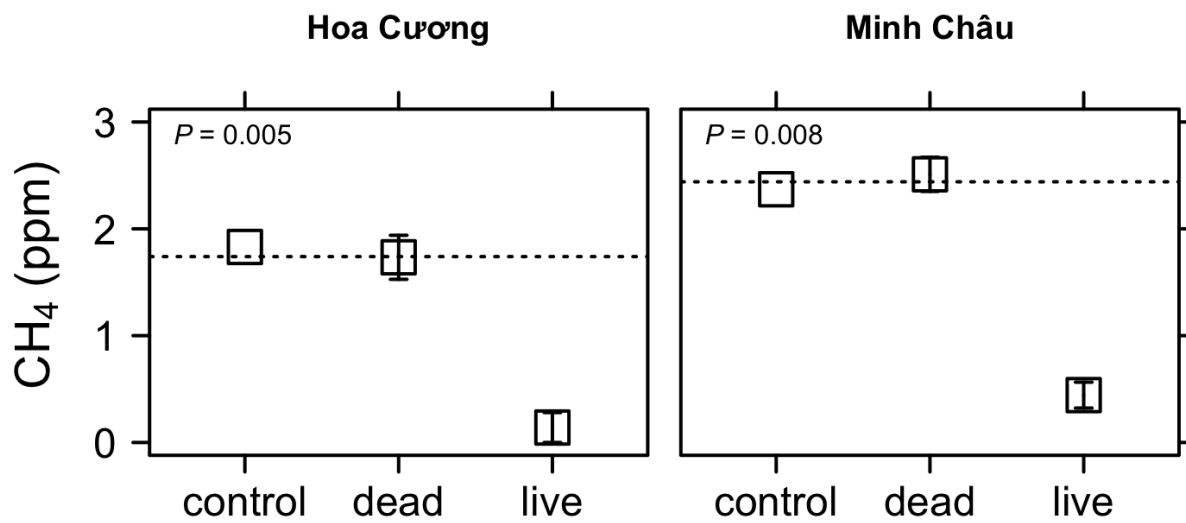

Source: https://www.biorxiv.org/content/10.1101/034801v2.full.pdf
